# Supplementary material
Source: HighWire-hosted journal article supplement (https://erj.ersjournals.com/highwire/filestream/132443/field_highwire_adjunct_files/0/ERJ-00412-2016_Figure_S1.pdf)

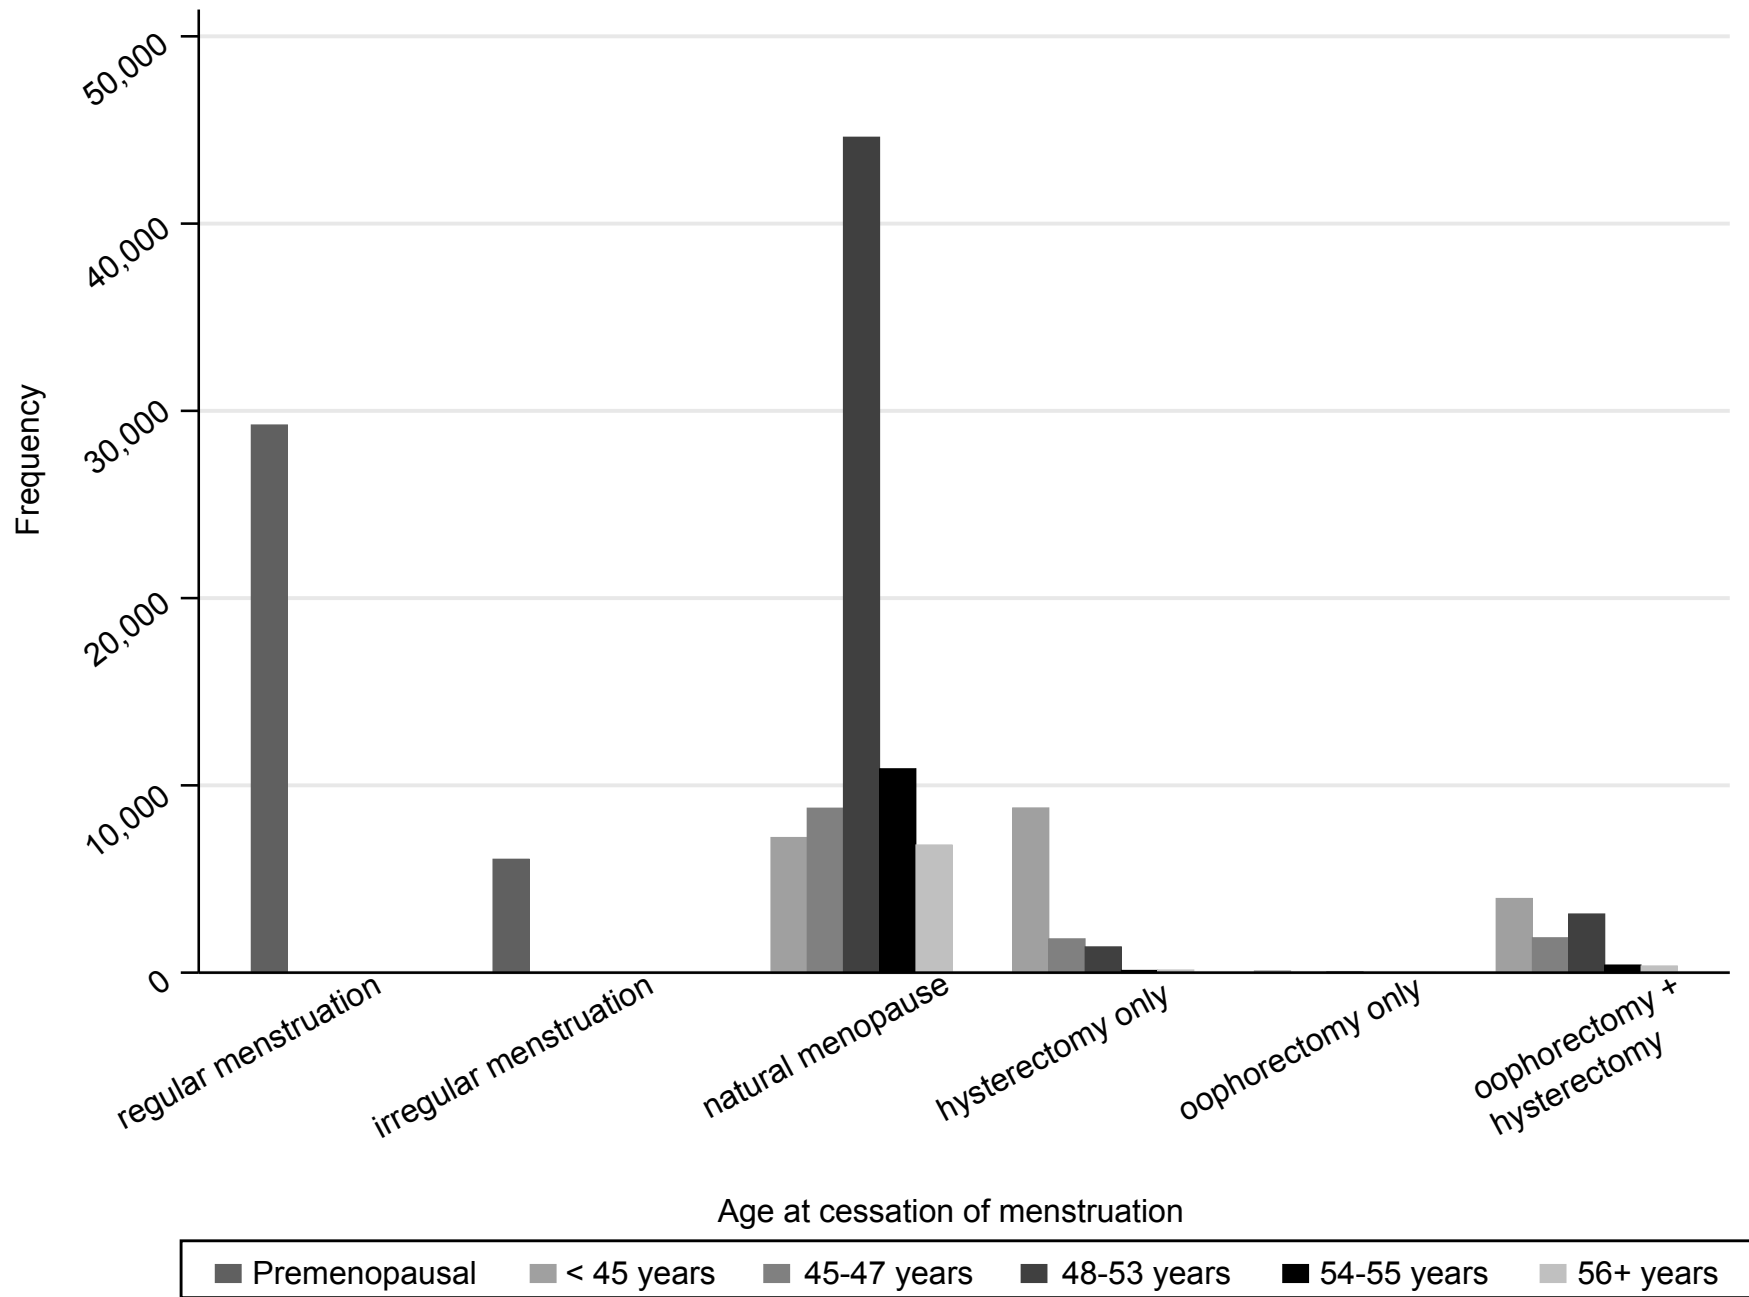

**Supplementary figure 1.** Age at cessation of menstruation by menstrual status.

Supplement: ERJ-00412-2016_Figure_S1.pdf [file ERJ-00412-2016_Figure_S1.pdf]
